# Supplementary material for: Induction of AHR Signaling in Response to the Indolimine Class of Microbial Stress Metabolites
Source: MDPI journal article supplement (doi:10.3390/metabo13090985), 2023-08-31
Supplement: s1 [file s1]

## Supplemental Methods

### General chemistry methods

**LC/MS method section.** Reagents and solvents were purchased from commercial vendors and were of the highest purity available and used without further purification unless otherwise noted. Qualitative/quantitative analysis was performed by reverse phase UHPLC using a Prominence 20 UFLCXR system (Shimadzu, Columbia, MD) with a Waters (Milford, MA) ACQUITY UPLC BEH C18 column (2.1 × 100 mm, 1.7 μm particle size) maintained at 55 °C and a 20 min aqueous acetonitrile gradient, at a flow rate of 250 μL/min. Solvent A was water with 0.1% formic acid and Solvent B was acetonitrile with 0.1% formic acid. The initial condition were 97% A and 3 % B, increasing to 45% B at 10 min, 75% B at 12 min where it was held at 75% B until 17.5 min before returning to the initial conditions. The eluate was delivered into an AB SCIEX TripleTOF™ 5600 System (QTOF) using a Duospray™ ion source (AB SCIEX, Framingham, MA). Purities of assayed compounds were in all cases greater than 95%, as determined by a Waters 2695 HPLC system (Waters, Milford, MA, U.S.A) with a Restek (Bellefonte, PA, U.S.A) HPLC C18 column (4.6 × 150 mm, 5 μm particle size) and a Viva C18 guard cartridge (10 × 4.0 mm, 5 μm particle size) with a 10 μL of injection volume. The mobile phase solvent A was 0.1% formic acid in water, and solvent B was 0.1% formic acid in acetonitrile. The gradient program was: 0-18 min, 5-45% B in A; 18-22 min, 45-90% B in A; 22-27 min, 90% B in A; 27-27.5 min, 90-5% B in A; 27.5-35 min, 5% B in A at a flow of 1 mL/min.

**NMR method section.** Each compound was dissolved in methanol-d<sub>4</sub> or DMSO-d<sub>6</sub>. All NMR data were acquired at 298 K on Bruker Avance NEO 600 MHz spectrometer (Bruker Biospin, Rheinstetten, Germany) equipped with a 5 mm TCI cryoprobe. 1D <sup>1</sup>H NMR spectra and a series of 2D NMR spectra, including <sup>1</sup>H -<sup>1</sup>H TOCSY, <sup>1</sup>H -<sup>1</sup>H COSY, <sup>1</sup>H -<sup>1</sup>H JRes, <sup>1</sup>H -<sup>13</sup>C HSQC, and <sup>1</sup>H -<sup>13</sup>C HMBC, were recorded and processed as previously described with some modifications.<sup>56</sup> The <sup>1</sup>H and <sup>13</sup>C chemical shifts were referenced to deuterated solvent residual proton signal at 3.31 ppm and <sup>13</sup>C signal at 49.5 ppm in methanol-d<sub>4</sub>, respectively and at 2.50 ppm and 39.5 ppm in DMSO-d<sub>6</sub>, respectively. Coupling constants (J value) are reported in Hz. Spin multiplicities are described as s (singlet), br (broad singlet), d (doublet), t (triplet), and m (multiplet).

## Synthesis of Indolimines:

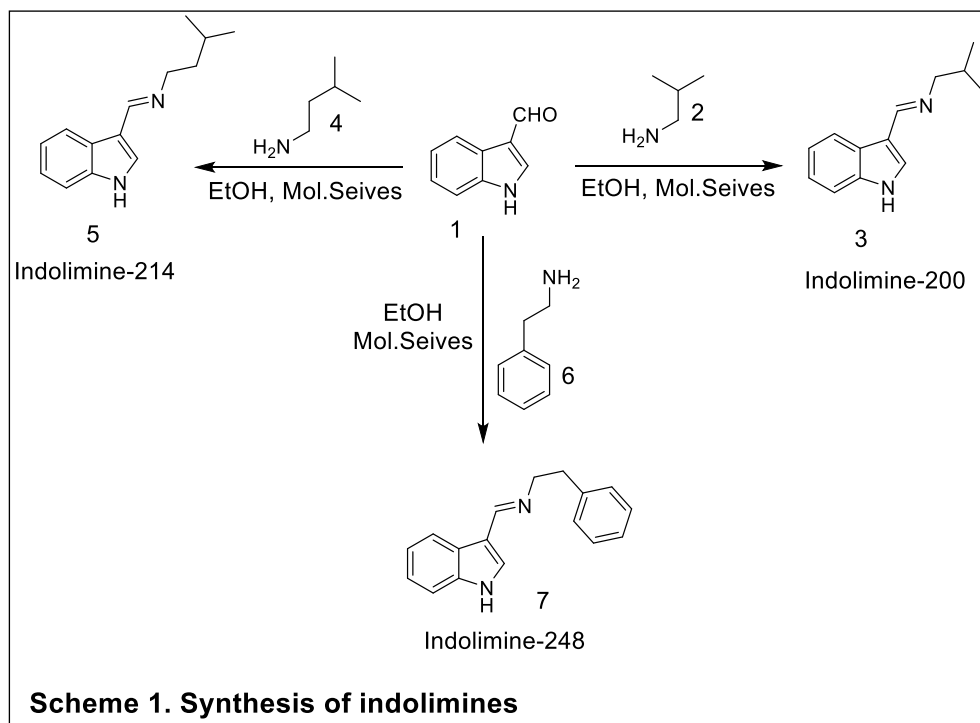

Indolimine-200, indolimine-214, and indolimine-248 were synthesized as shown in Scheme 1.

### Synthesis of (*E*)-1-(1H-indol-3-yl)-*N*-isobutylmethanimine (Indolimine-200) (3):

Indol-3-carboxaldehyde **1** (500 mg, 3.44 mmol) and isobutylamine **2** (1.5 eq, 377 mg, 5.16 mmol) were dissolved in anhydrous ethanol (50 mL). Molecular sieves (5 g) were added, and the reaction mixture was refluxed for 7-8 hrs until the aldehyde completely disappeared (TLC). The reaction mixture was filtered through celite, and the excess isobutylamine was removed by rotavaporation, and the product was dried in a high vacuum pump to obtain (indolimine-200) **3** (660 mg, yield 95%) as a brown viscous oil. The identity of indolimine-200 was confirmed by nuclear magnetic resonance (NMR) and mass spectra analysis. <sup>1</sup>H-NMR (600 MHz, MeOD, 25 °C): δ 8.46 (s, 1H, N=CH), 8.08 (m, 1H, =CH), 7.70 (s, 1H, =CH-N), 7.41 (m, 1H, =CH), 7.19 (m, 1H, =CH), 7.14 (m, 1H, =CH), 3.40 (dd, *J* = 6.72 Hz, 1.16 Hz, 2H, CH<sub>2</sub>), 1.99 (m, 1H, CH), 0.99 (d, *J* = 6.72 Hz, 6H, CH<sub>3</sub>); <sup>13</sup>C-NMR (150 MHz, MeOD, 25 °C): δ 158.78, 139.2, 131.45, 127.07, 124.03, 121.97, 121.68, 115.5, 113.01, 70.7, 31.16, 21.1.

### Synthesis of (*E*)-1-(1H-indol-3-yl)-*N*-isopentylmethanimine (Indolimine-214) (5):

Compound **5** was synthesized by following a similar experimental procedure as used above for compound **3**, starting from indol-3-carboxaldehyde **1** (500 mg, 3.44 mmol) and isopentylamine **4** (1.5 eq, 450 mg, 5.16 mmol). Indolimine-214 was characterized by NMR and mass spectra analysis (brown viscous oil, 690 mg, yield 93%). <sup>1</sup>H-NMR (600 MHz, DMSO-d<sub>6</sub>, 25 °C): δ 11.43

(br, 1H, NH), 8.45 (s, 1H, N=CH), 8.19 (m, 1H, =CH), 7.72 (s, 1H, =CH-N), 7.41 (m, 1H, =CH), 7.15 (m, 1H, =CH), 7.08 (m, 1H, =CH), 3.52 (dt,  $J = 7.15$  Hz, 1.1 Hz, 2H, CH<sub>2</sub>), 1.71 (m, 2H, CH<sub>2</sub>), 1.51 (q,  $J = 7.05$  Hz, 1H, CH), 0.93 (d,  $J = 6.66$  Hz, 6H, CH<sub>3</sub>); <sup>13</sup>C-NMR (150 MHz, DMSO-d<sub>6</sub>, 25 °C):  $\delta$  154.95, 136.83, 130.26, 124.94, 122.06, 121.4, 119.93, 114.4, 111.36, 59.24, 40.04, 25.09, 22.26.

**Synthesis of (*E*)-1-(1H-indol-3-yl)-*N*-phenethylmethanimine (Indolimine-248) (7):**

The experimental procedure used for synthesizing compound **7** was also the same as **3**.

Compound **7** was prepared from indol-3-carboxaldehyde **1** (500 mg, 3.44 mmol) and phenethylamine **6** (1.5 eq, 625 mg, 5.16 mmol) in ethanol. The excess phenethylamine was removed by repeatedly washing the product with hexane and dried using a high vacuum pump to afford indolimine-248 as a brown viscous oil, and it was characterized by NMR and mass spectra analysis (760 mg, yield 88%). <sup>1</sup>H-NMR (600 MHz, MeOD, 25 °C):  $\delta$  8.33 (s, 1H, N=CH), 8.05 (m, 1H, =CH), 7.64 (s, 1H, =CH-N), 7.4 (m, 1H, =CH), 7.248 (m, 2H, =CH), 7.247 (m, 2H, =CH), 7.19 (m, 1H, =CH), 7.157 (m, 1H, =CH), 7.13 (m, 1H, =CH), 3.80 (dt,  $J = 7.3$  Hz, 1.1 Hz, 2H, CH<sub>2</sub>), 2.99 (t,  $J = 7.3$  Hz, 2H, CH<sub>2</sub>); <sup>13</sup>C-NMR (150 MHz, MeOD, 25 °C):  $\delta$  159.16, 141.36, 139.03, 131.39, 130.3, 129.47, 127.2, 126.96, 123.9, 121.9, 121.61, 115.44, 112.89, 64.15, 39.01.

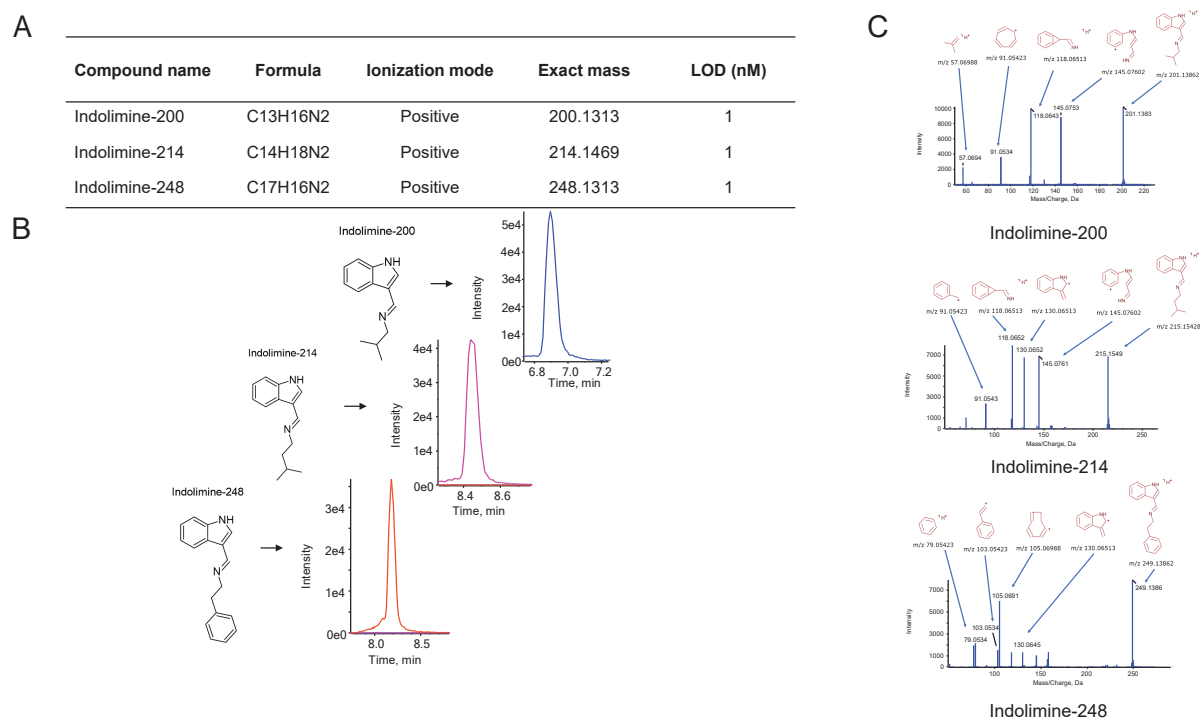

**Figure S1.** Identification of synthetic indolimines by LC-MS/MS. A, Overview of LC-MS/MS parameters of indolimines. B, Extracted ion chromatograms (EICs) of indolimines. C, Fragmentation annotations of the indolimines.

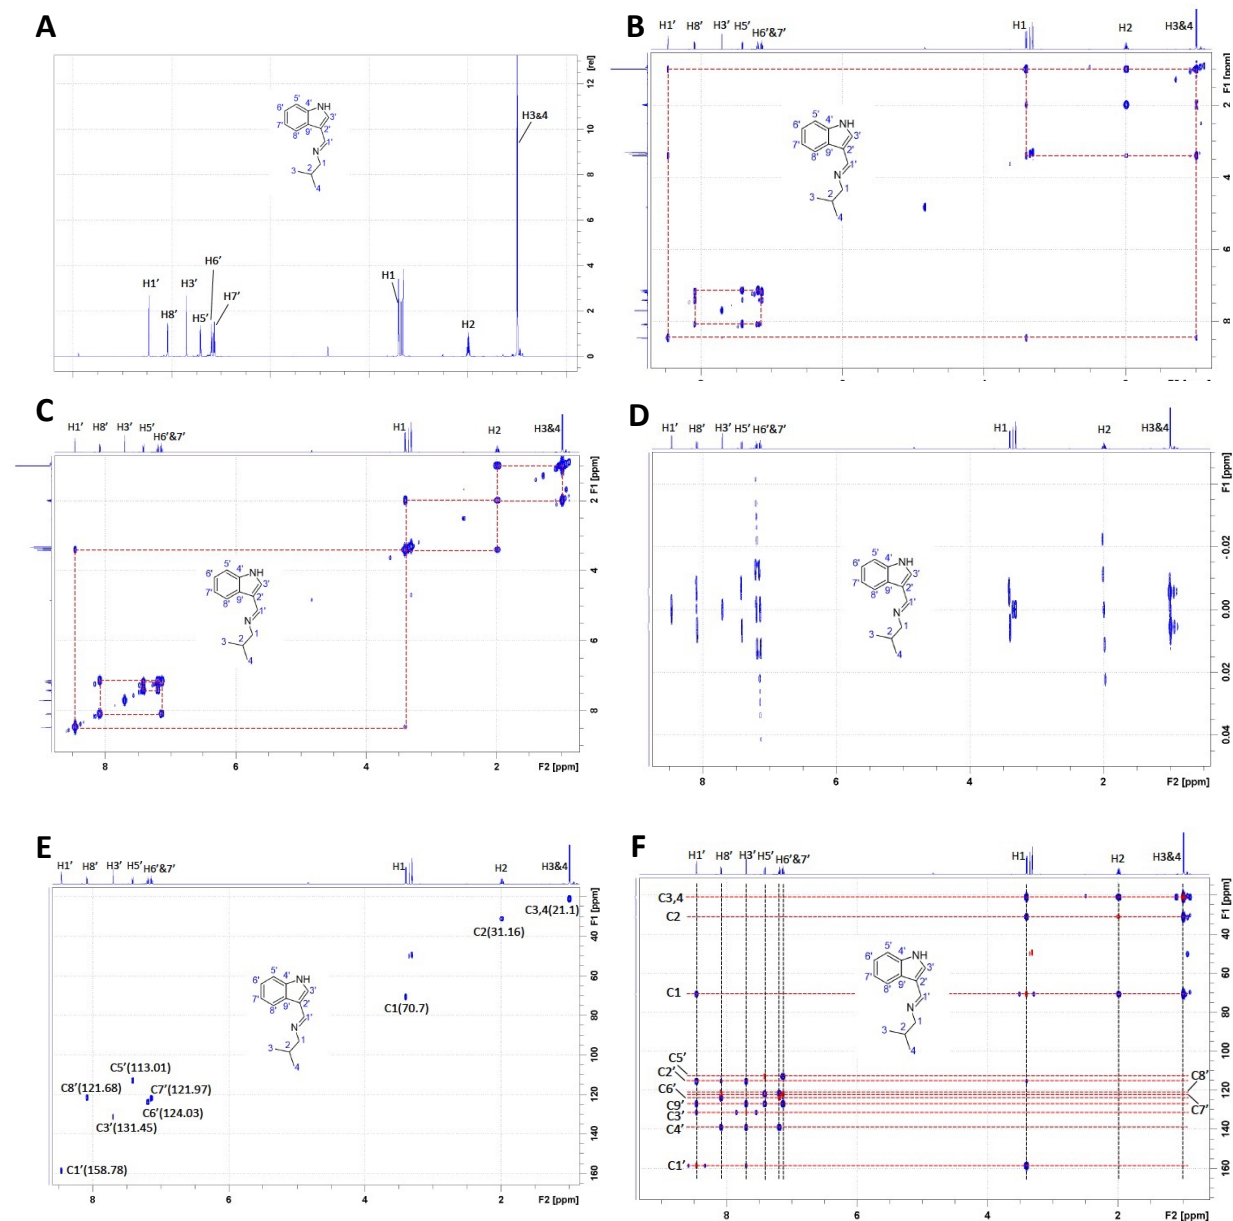

**Figure S2.** Conformation of the structure of indolimine-200 by NMR. (A) 1D  $^1\text{H}$  spectrum of indolimine-200 with assignments. (B)  $^1\text{H}$ - $^1\text{H}$  TOCSY spectrum of indolimine-200 with signal assignments. (C)  $^1\text{H}$ - $^1\text{H}$  COSY spectrum of indolimine-200 with signal assignments. (D)  $^1\text{H}$ - $^1\text{H}$  JREs spectrum of indolimine-200 showing J-coupling patterns. (E)  $^1\text{H}$ - $^{13}\text{C}$  HSQC spectrum of indolimine-200 and signal assignments. (F)  $^1\text{H}$ - $^{13}\text{C}$  HMBC (blue) and HSQC (red) spectrum of indolimine-200 and signal assignments.

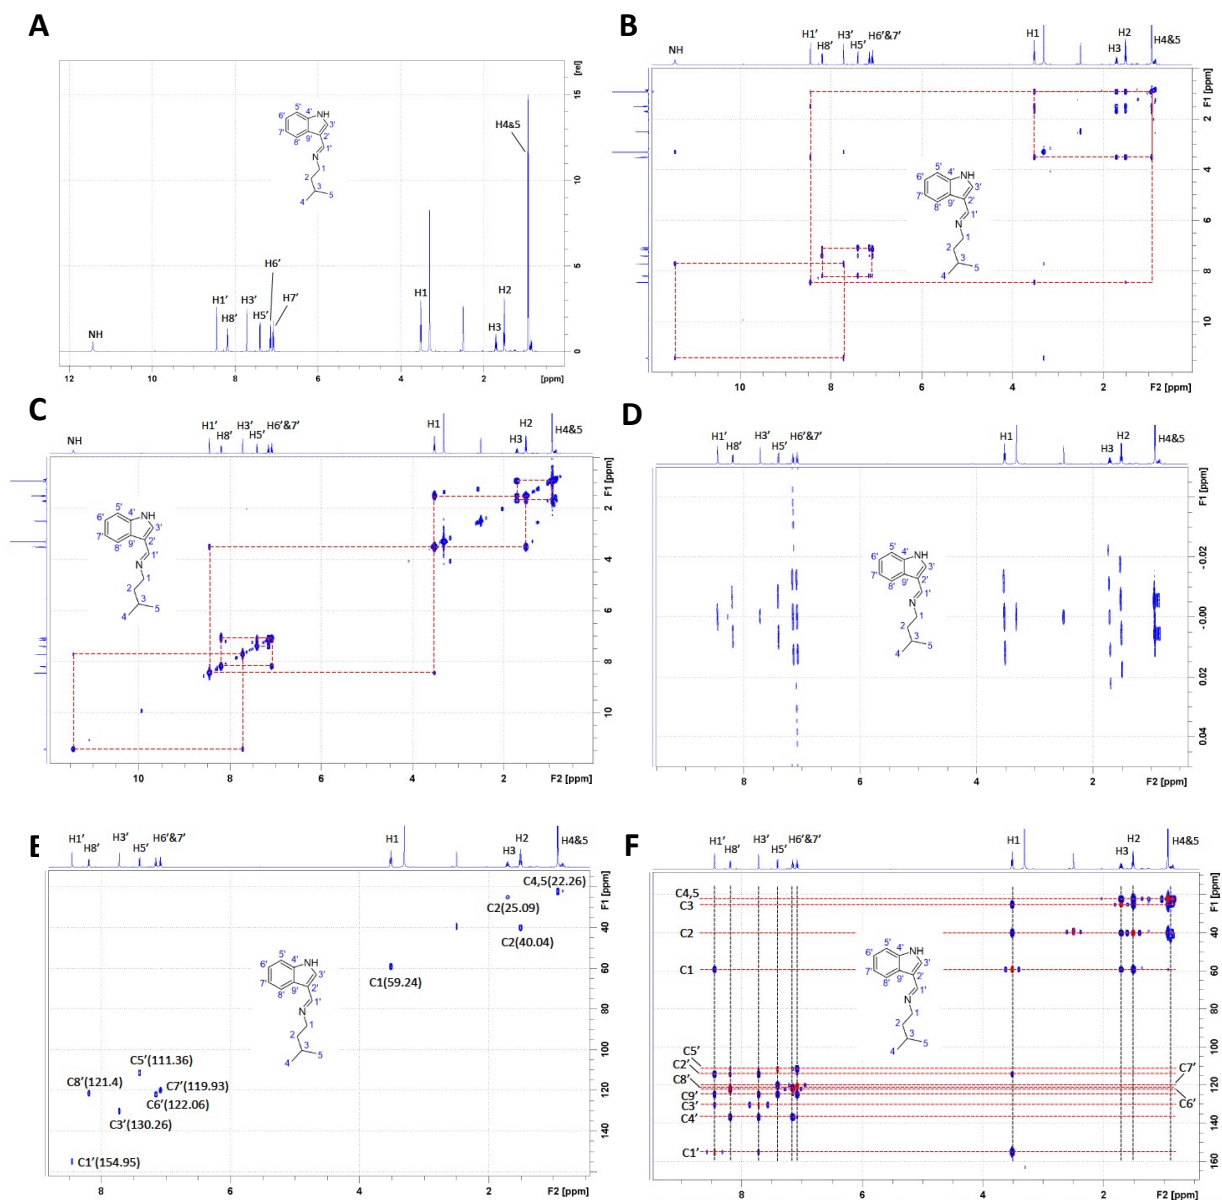

**Figure S3.** Conformation of the structure of indolimine-214 by NMR. (A) 1D  $^1\text{H}$  spectrum of indolimine-214 with assignments. (B)  $^1\text{H}$ - $^1\text{H}$  TOCSY spectrum of indolimine-214 with signal assignments. (C)  $^1\text{H}$ - $^1\text{H}$  COSY spectrum of indolimine-214 with signal assignments. (D)  $^1\text{H}$ - $^1\text{H}$  JREs spectrum of indolimine-214 showing J-coupling patterns. (E)  $^1\text{H}$ - $^{13}\text{C}$  HSQC spectrum of indolimine-214 and signal assignments. (F)  $^1\text{H}$ - $^{13}\text{C}$  HMBC (blue) and HSQC (red) spectrum of indolimine-214 and signal assignments.

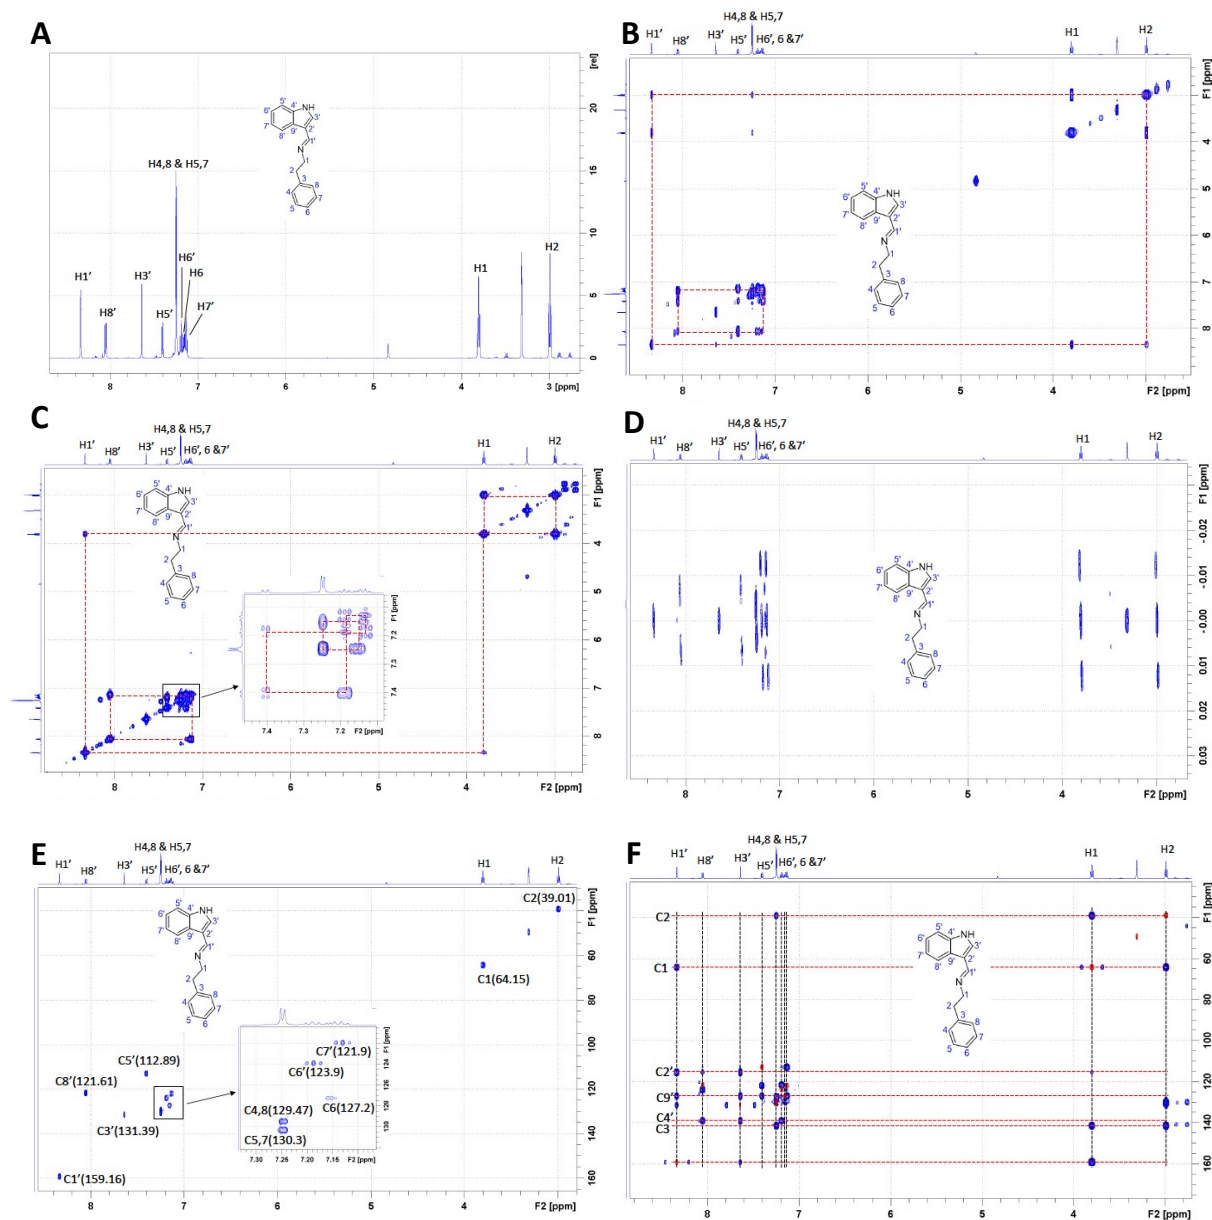

**Figure S4.** Conformation of the structure of indolimine-248 by NMR. (A) 1D  $^1\text{H}$  spectrum of indolimine-248 with assignments. (B)  $^1\text{H}$ - $^1\text{H}$  TOCSY spectrum of indolimine-248 with signal assignments. (C)  $^1\text{H}$ - $^1\text{H}$  COSY spectrum of indolimine-248 with signal assignments. (D)  $^1\text{H}$ - $^1\text{H}$  JREs spectrum of indolimine-248 showing J-coupling patterns. (E)  $^1\text{H}$ - $^{13}\text{C}$  HSQC spectrum of indolimine-248 and signal assignments. (F)  $^1\text{H}$ - $^{13}\text{C}$  HMBC (blue) and HSQC (red) spectrum of indolimine-248 and signal assignments.

**Supplemental Table S1. Primer sequences utilized in qRT-PCR analysis.**

| Gene          | Forward sequence (5'→3')        | Reverse sequence (5'→3')       |
|---------------|---------------------------------|--------------------------------|
| <i>ACTB</i>   | <i>caccattggcaatgagcgattc</i>   | <i>aggtctttacggatatccacat</i>  |
| <i>CYP1A1</i> | <i>acctcagcagccacctccaagat</i>  | <i>gaggctcttgaggccctgat</i>    |
| <i>AHRR</i>   | <i>gtgcgaatcggaactgcatggaaa</i> | <i>tcagtctgttcctgagcaccaaa</i> |
| <i>PARP7</i>  | <i>gattctcaggagcacttggaag</i>   | <i>tggtgtggacagccttgctagt</i>  |
| <i>IL6</i>    | <i>agacagccactcaggtcttca</i>    | <i>ttctgccagtgcctctttactg</i>  |

**Supplemental Table S2. Computational Validation of the human AHR PAS-B domain model.**

| Model                                     | Active Site Cavity Volume (Å <sup>3</sup> ) <sup>a</sup> | Test Ligand | ANF Binding Energy (kcal/mol) <sup>b</sup> | ANF Re-Docking Error RMSD (Å) <sup>c</sup> |
|-------------------------------------------|----------------------------------------------------------|-------------|--------------------------------------------|--------------------------------------------|
| Human AHR PAS B domain model<br>PDB: 7ZUB | 830                                                      | Indirubin   | -12.8                                      | 0.498                                      |

<sup>a</sup> Active site volume or cavity size (in angstroms) as calculated using the program Caver Web 1.0.

<sup>b</sup> Autodock Vina Binding Energy for Indirubin in a 30 Å<sup>3</sup> grid centered on the PAS-B domain of the AHR (7SUB).

<sup>c</sup> RMSD deviation for Indirubin re-docking solutions in structure-based models in Autodock Vina, as calculated using LigRMSD. Models with a ligand re-docking RMSD error of less than 2.0 Å are generally considered acceptable for our docking protocol.
